# Supplementary material
Source: HighWire-hosted journal article supplement (https://dmd.aspetjournals.org/content/suppl/2018/03/05/dmd.117.079244)
Supplement: Supplemental_79244.pdf [file Supplemental_79244.pdf]

**Journal: Drug Metabolism and Disposition**

**Liver zonation index of drug transporter and metabolizing enzyme protein expressions in mouse liver acinus.**

Masanori Tachikawa, Yuna Sumiyoshiya, Daisuke Saigusa, Kazunari Sasaki, Michitoshi Watanabe, Yasuo Uchida, Tetsuya Terasaki

**Supplemental Methods**

*Sulforhodamine101 (SR-101) uptake by mouse Oatp2b1-overexpressing HEK293 cells*

HEK293 cells transiently expressing Oatp2b1 were generated by transfection of myc-DDK-tagged open reading frame of mouse Oatp2b1 inserted in the pCMV6 vector (OriGene Technologies, Rockville, MD), respectively. The transfection was performed using Lipofectamine™ 2000 and Opti-MEM I medium (Invitrogen) according to the manufacturer's protocol. Briefly, the cells were seeded at 90% confluence in 24-well plates using antibiotic-free medium. The complex of the vector and lipofectamine was incubated with the cells for 6 h, and then the cells were cultured in normal culture medium for 24 hrs. For uptake study, the cells were washed with normal extracellular fluid (ECF) buffer (122 mM NaCl, 25 mM NaHCO<sub>3</sub>, 3 mM KCl, 0.4 mM K<sub>2</sub>HPO<sub>4</sub>, 10 mM glucose, 1.4 mM CaCl<sub>2</sub>, 1.2 mM MgSO<sub>4</sub> and 10 mM HEPES, pH 7.4). Uptake was initiated by applying 300 µL normal ECF buffer containing 1 µM SR101 at 37°C. At 20 min, the solution was removed to terminate uptake, and the cells were washed in ice-cold normal ECF buffer. Images were taken with a fluorescence microscope (Fluoview, Olympus, Tokyo, Japan). The cells were then homogenized in distilled water using a sonicator. The homogenate was centrifuged at 21,600xg for 5 min at 4°C and the supernatant was collected. The cell-associated fluorescence was measured with a fluorescence detector (Fluoroscanner Acent FL, Thermo Fisher Scientific, Waltham, MA). The accumulation of SR-101 in the cells was expressed as the cell-associated fluorescence per well.

**Supplemental Table S1 Target peptide sequences and selected/multiple reaction monitoring (SRM/MRM) transitions for quantification of each protein**

| Molecule                  | Target peptide sequence | SRM/MRM transitions (m/z) |          |          |          |          |
|---------------------------|-------------------------|---------------------------|----------|----------|----------|----------|
|                           |                         | Q1                        | Q3-1     | Q3-2     | Q3-3     | Q3-4     |
| Slc21a7/Oatp1a5           | SENSPLYIGILESGK         | 803.9                     | 1189.683 | 816.4828 | 703.3987 | 533.2931 |
|                           | SENSPLYIGIL*ESGK        | 807.4                     | 1196.7   | 823.5    | 710.4159 | 540.3103 |
| Slc38a4/Ata3              | TSVITLLFP               | 573.8                     | 859.5402 | 746.4561 | 532.3243 | 419.2402 |
|                           | TSVITLLFP*R             | 576.9                     | 865.554  | 752.4699 | 538.3381 | 425.254  |
| Abca2                     | LLFGPLPDLGK             | 642.9                     | 1058.552 | 911.4833 | 757.4092 | 432.2454 |
|                           | LLFGPLPDL*DGK           | 646.4                     | 1065.569 | 918.5004 | 764.4264 | 439.2624 |
| Abca3                     | VFQVGNK                 | 396.2                     | 692.3727 | 545.3043 | 318.1773 | 417.2457 |
|                           | VFQV*GNK                | 399.2                     | 698.3864 | 551.3181 | 318.1773 | 423.2594 |
| Abca4                     | WIAEPAR                 | 421.7                     | 656.3727 | 543.2886 | 343.2089 | 175.119  |
|                           | WIAEPA*R                | 423.7                     | 660.3798 | 547.2957 | 347.216  | 175.119  |
| Abca5                     | NAVVPIK                 | 370.7                     | 357.2498 | 555.3866 | 456.3182 | 626.4237 |
|                           | NAVVPI*K                | 374.2                     | 364.267  | 562.4038 | 463.3354 | 633.4409 |
| Abca6, 8a, 9              | LFPQAAR                 | 401.7                     | 542.3046 | 445.2518 | 317.1932 | 689.373  |
|                           | LFPQAA*R                | 403.7                     | 546.3117 | 449.2589 | 321.2003 | 693.3801 |
| Abca7                     | QFQSPLR                 | 438.2                     | 385.2559 | 600.3464 | 472.2879 | 747.4149 |
|                           | QFQSPL*R                | 441.7                     | 392.2731 | 607.3637 | 479.3051 | 754.4321 |
| Abca8a                    | DLTLDVYK                | 483.8                     | 738.4033 | 637.3556 | 524.2715 | 310.1762 |
|                           | DLTLDV*YK               | 486.8                     | 744.4171 | 643.3694 | 530.2853 | 310.1762 |
| Abca8b                    | LFPQASR                 | 409.7                     | 705.3679 | 558.2995 | 461.2467 | 333.1881 |
|                           | LFPQA*SR                | 411.7                     | 709.375  | 562.3066 | 465.2538 | 337.1952 |
| Abca9                     | LLPQEEL                 | 421.2                     | 227.1757 | 615.2986 | 132.102  | 710.3723 |
|                           | LLP*QEEL                | 424.2                     | 227.1757 | 621.3124 | 132.102  | 716.3861 |
| Abca12                    | LLAIPIDNR               | 561.3                     | 711.3784 | 501.2416 | 824.4626 | 614.3257 |
|                           | LLAIPIDNR               | 564.3                     | 717.3923 | 507.2554 | 830.4764 | 620.3395 |
| Abca13                    | NIVWDPQK                | 500.3                     | 487.2512 | 772.3989 | 673.3305 | 372.2243 |
|                           | NIVWDP*QK               | 503.3                     | 493.265  | 778.4127 | 679.3443 | 378.2381 |
| Abcb4 / mdr2              | IATEAIENIR              | 565.3                     | 531.2886 | 715.4098 | 644.3727 | 844.4524 |
|                           | IATEA*IENIR             | 567.3                     | 531.2886 | 719.4169 | 644.3727 | 848.4595 |
| Cyp1a2                    | YLPNPALK                | 458.3                     | 620.3647 | 428.2869 | 542.3298 | 331.2341 |
|                           | YLPNPALK*               | 462.3                     | 620.3647 | 436.3011 | 550.344  | 339.2483 |
| Cyp2a5                    | GYGVVFSSGER             | 579.3                     | 781.3839 | 682.3155 | 377.1822 | 535.2471 |
|                           | GYGVVFSSGER*            | 584.3                     | 791.3922 | 692.3238 | 377.1822 | 545.2554 |
| Cyp2c29                   | NISQSFTNFSK             | 636.8                     | 1045.495 | 830.4043 | 743.3723 | 596.3039 |
|                           | NISQSFTNFSK*            | 640.8                     | 1053.509 | 838.4185 | 751.3865 | 604.3181 |
| Cyp2d22                   | GTTLITNLSSALK           | 659.9                     | 833.4728 | 486.2926 | 946.5569 | 732.4251 |
|                           | GTTLITNLSSALK*          | 663.9                     | 841.487  | 486.2926 | 954.5711 | 740.4393 |
| Ugt1a1                    | SLSFNDR                 | 463.2                     | 725.3212 | 638.2892 | 491.2208 | 201.1236 |
|                           | SLSFNDR*                | 468.2                     | 735.3295 | 648.2975 | 501.2291 | 201.1236 |
| Ugt1a9                    | SFLTGSAR                | 419.7                     | 235.108  | 604.341  | 491.257  | 390.21   |
|                           | SFLTGSAR*               | 424.7                     | 245.108  | 614.341  | 501.257  | 400.21   |
| Ugt2b5                    | GAAVALNIR               | 442.8                     | 200.103  | 586.367  | 129.066  | 299.171  |
|                           | GAAVALNIR*              | 447.8                     | 200.103  | 596.367  | 129.066  | 299.171  |
| Ugt2b36                   | TPATLGPNTN              | 514.3                     | 544.284  | 657.368  | 758.416  | 487.262  |
|                           | TPATLGPNTN*             | 519.3                     | 554.284  | 667.368  | 768.416  | 497.262  |
| HMG-CoA reductase         | LAEPSSLQYLPYR           | 768.9                     | 1223.642 | 435.2351 | 839.4411 | 314.1713 |
|                           | LAEPSSLQYLPYR*          | 773.9                     | 1233.65  | 445.2434 | 849.4494 | 314.1713 |
| NADPH-CPR                 | FAVFGLGNK               | 476.8                     | 635.3513 | 734.4197 | 488.2829 | 805.4568 |
|                           | FAVFGL*GNK              | 480.3                     | 642.3685 | 741.4369 | 495.3001 | 812.474  |
| FcRn                      | EQLFLEALK               | 545.8                     | 573.3606 | 460.2766 | 720.4291 | 833.5131 |
|                           | EQLFLEALK*              | 549.8                     | 581.3748 | 468.2908 | 728.4433 | 841.5273 |
| Glutamine synthetase (GS) | DIVEAHYR                | 501.8                     | 774.3893 | 675.3209 | 546.2783 | 387.6983 |
|                           | DIVEAHYR*               | 506.8                     | 784.3976 | 685.3292 | 556.2866 | 392.7024 |
| Actin                     | AGFAGDDAPR              | 488.7                     | 701.3213 | 630.2842 | 458.2358 | 343.2089 |
|                           | AGFAGDDAPR*             | 491.7                     | 707.3351 | 636.298  | 464.2496 | 349.2227 |

**Bold letters with asterisks indicate amino acid residues labeled with stable isotope (<sup>13</sup>C and <sup>15</sup>N).** Conditions of SRM/MRM analysis were optimized for high signal intensity following direct injection of peptide solution into the mass spectrometer through a turbo ion spray source. Theoretical m/z values of doubly charged ions of intact peptides (Q1) were assumed for precursor ions. Four singly charged fragment ions (Q3) were derived from each precursor ion.

| Alias                  | Limit of quantification<br>(fmol/mm <sup>2</sup> ) |          |
|------------------------|----------------------------------------------------|----------|
|                        | SR101(+)                                           | SR101(-) |
| <b>Slc transporter</b> |                                                    |          |
| Slc2a1/Glut1           | 0.287                                              | 0.309    |
| Slc6a2/Net             | 1.11                                               | 1.10     |
| Slc7a5/Lat1            | 0.565                                              | 0.551    |
| Slc16a7/Mct2           | 0.860                                              | 0.872    |
| Slc21a2/Oatp2a1 (Pgt)  | 1.94                                               | 1.48     |
| Slc21a5/Oatp1a4        | 3.00                                               | 4.11     |
| Slc21a7/Oatp1a5        | 2.41                                               | 2.29     |
| Slc21a9/Oatp2b1        | 1.29                                               | 1.24     |
| Slc21a11/Oatp3a1       | 1.43                                               | 1.36     |
| Slc21a12/Oatp4a1       | 0.635                                              | 0.604    |
| Slc21a13/Oatp1a6       | 2.21                                               | 2.08     |
| Slc21a14/Oatp1c1       | 0.685                                              | 0.649    |
| Slc21a17/Oatp17        | 1.03                                               | 1.15     |
| Slc21a18/Oatp18        | 2.30                                               | 2.23     |
| Slc38a4/Ata3           | 0.375                                              | 0.402    |
| Slc47a1/Mate1          | 1.18                                               | 1.14     |
| <b>Abc transporter</b> |                                                    |          |
| Abca1                  | 0.448                                              | 0.427    |
| Abca2                  | 1.15                                               | 1.14     |
| Abca3                  | 0.332                                              | 0.329    |
| Abca5                  | 0.315                                              | 0.316    |
| Abca6, 8a, 9           | 0.839                                              | 0.868    |
| Abca7                  | 0.323                                              | 0.298    |
| Abca8a                 | 1.47                                               | 1.40     |
| Abca8b                 | 0.445                                              | 0.461    |
| Abca9                  | 0.487                                              | 0.493    |
| Abca12                 | 0.834                                              | 0.853    |
| Abca13                 | 0.547                                              | 0.529    |
| Abcb1a/Mdr1a           | 0.425                                              | 0.406    |
| Abcb1b/Mdr1b           | 0.566                                              | 0.544    |
| Abcc3/Mrp3             | 0.677                                              | 0.651    |
| Abcc5/Mrp5             | 0.220                                              | 0.225    |
| Abcc12/Mrp9            | 0.503                                              | 0.464    |
| Abcg8                  | 0.257                                              | 0.264    |
| <b>Enzyme</b>          |                                                    |          |
| Cyp1a2                 | 32.3                                               | 32.1     |
| Cyp2a5                 | 0.399                                              | 0.385    |
| Ugt2b5                 | 1.93                                               | 1.82     |
| HMG-CoA reductase      | 0.620                                              | 0.594    |

**Supplemental Table S3 Summary of the zoned expressions of transporters and metabolizing enzymes in peri-portal vein (PP) or peri-central vein (PC) regions of the liver in rodents**

| Molecule               |         | Species                 | Method                                                                                 | mRNA<br>Protein | Distribution<br>in PP and PC<br>regions                                                                      | Reference                    |
|------------------------|---------|-------------------------|----------------------------------------------------------------------------------------|-----------------|--------------------------------------------------------------------------------------------------------------|------------------------------|
| <b>Slc transporter</b> |         |                         |                                                                                        |                 |                                                                                                              |                              |
| Slc10a1                | Ntcp    | Male Sprague-Dawley Rat | Quantitative PCR/Isolated hepatocytes by ante- or retrograde perfusion with digitonin  | mRNA            | PP=PC                                                                                                        | (Baier et al., 2006)         |
|                        |         |                         | Immunohistochemistry                                                                   | Protein         | PP=PC                                                                                                        |                              |
|                        |         | Male Sprague-Dawley Rat | Immunohistochemistry                                                                   | Protein         | PP=PC                                                                                                        | (Donner et al., 2007)        |
| Slc21a1                | Oatp1a1 | Male Sprague-Dawley Rat | Immunoblot/Isolated hepatocytes enriched by digitonin/collagenase perfusion            | Protein         | PP=PC                                                                                                        | (Abu-Zahra et al., 2000)     |
|                        |         | Male Sprague-Dawley Rat | Quantitative PCR/ Isolated hepatocytes by ante- or retrograde perfusion with digitonin | mRNA            | PP=PC<br>*mRNA<br>expression tends to be greater in PC region although there is no statistical significance. | (Baier et al., 2006)         |
|                        |         |                         | Immunohistochemistry                                                                   | Protein         | PP=PC<br>*Protein<br>expression is excluded in the midzonal area.                                            |                              |
|                        |         | Male Sprague-Dawley Rat | Immunohistochemistry                                                                   | Protein         | PP=PC                                                                                                        | (Donner et al., 2007)        |
| Slc21a10               | Oatp1b2 | Male Sprague-Dawley Rat | Immunohistochemistry                                                                   | Protein         | PP<PC                                                                                                        | (Donner et al., 2007)        |
| Slc22a1                | Oct1    | Rat                     | Immunohistochemistry                                                                   | Protein         | PP<PC                                                                                                        | (Meyer-Wentrup et al., 1998) |
| Slc22a7                | Oat2    | Rat                     | Quantitative PCR/Laser capture microdissection                                         | mRNA            | PP=PC                                                                                                        | (Fork et al., 2011)          |
| <b>Abc transporter</b> |         |                         |                                                                                        |                 |                                                                                                              |                              |
| Abcb11                 | Bsep    | Male Sprague-           | Quantitative PCR/Isolated hepatocytes by ante- or                                      | mRNA            | PP<PC                                                                                                        | (Baier et al., 2006)         |

|               |         |                            |                                                                                                                       |                     |                                                            |                          |
|---------------|---------|----------------------------|-----------------------------------------------------------------------------------------------------------------------|---------------------|------------------------------------------------------------|--------------------------|
|               |         | Dawley Rat                 | retrograde perfusion with digitonin<br><br>Immunohistochemistry                                                       | Protein             | PP<PC<br>* Predominant pericentral cytoplasmatic staining. |                          |
|               |         | Male Sprague-Dawley Rat    | Immunohistochemistry                                                                                                  | Protein             | PP=PC                                                      | (Donner et al., 2007)    |
| Abcc2         | Mrp2    | Male Wistar Rat            | Immunohistochemistry                                                                                                  | Protein             | PP>PC                                                      | (Micuda et al., 2008)    |
|               |         | Male Sprague-Dawley Rat    | Quantitative PCR/<br>Isolated hepatocytes by ante- or retrograde perfusion with digitonin<br><br>Immunohistochemistry | mRNA<br><br>Protein | PP=PC<br><br>PP=PC                                         | (Baier et al., 2006)     |
| Abcc4         | Mrp4    | Male Sprague-Dawley Rat    | Immunohistochemistry                                                                                                  | Protein             | PP=PC                                                      | (Donner et al., 2007)    |
| <b>Enzyme</b> |         |                            |                                                                                                                       |                     |                                                            |                          |
| Cyp2c29       | Cyp2c29 | Male C3H/He Mouse          | Microarray/Isolated hepatocytes enriched by digitonin/collagenase perfusion                                           | mRNA                | PP<PC                                                      | (Braeuning et al., 2006) |
| Cyp2e1        | Cyp2e1  | Male C3H/He Mouse          | Quantitative PCR/Isolated hepatocytes enriched by digitonin/collagenase perfusion                                     | mRNA                | PP<PC                                                      | (Braeuning et al., 2006) |
|               |         | Male Alko mixed strain Rat | Immunohistochemistry                                                                                                  | Protein             | PP<PC                                                      | (Buhler et al., 1992)    |
| <b>Other</b>  |         |                            |                                                                                                                       |                     |                                                            |                          |
| Glul          | GS      | Mouse C3H/He Mouse         | Microarray and Immunoblot/Isolated hepatocytes enriched by digitonin/collagenase perfusion                            | mRNA<br>Protein     | PP<PC<br>PP<PC                                             | (Braeuning et al., 2006) |

Protein or mRNA expressions of transporters and metabolizing enzymes in liver PP or PC regions are summarized according to the previous reports. PP=PC: Even/Homogenous distribution in PP and PC regions, PP>PC: PP region-predominant distribution, PP<PC: PC region-predominant distribution

**References**

- Abu-Zahra TN, Wolkoff AW, Kim RB, and Pang KS (2000) Uptake of enalapril and expression of organic anion transporting polypeptide 1 in zonal, isolated rat hepatocytes. *Drug Metab Dispos* **28**:801-806.
- Baier PK, Hempel S, Waldvogel B, and Baumgartner U (2006) Zonation of hepatic bile salt transporters. *Dig Dis Sci* **51**:587-593.
- Braeuning A, Ittrich C, Kohle C, Hailfinger S, Bonin M, Buchmann A, and Schwarz M (2006) Differential gene expression in periportal and perivenous mouse hepatocytes. *FEBS J* **273**:5051-5061.
- Buhler R, Lindros KO, Nordling A, Johansson I, and Ingelman-Sundberg M (1992) Zonation of cytochrome P450 isozyme expression and induction in rat liver. *Eur J Biochem* **204**:407-412.
- Donner MG, Schumacher S, Warskulat U, Heinemann J, and Haussinger D (2007) Obstructive cholestasis induces TNF-alpha- and IL-1 -mediated periportal downregulation of Bsep and zonal regulation of Ntcp, Oatp1a4, and Oatp1b2. *Am J Physiol Gastrointest Liver Physiol* **293**:G1134-1146.
- Fork C, Bauer T, Golz S, Geerts A, Weiland J, Del Turco D, Schomig E, and Grundemann D (2011) OAT2 catalyses efflux of glutamate and uptake of orotic acid. *Biochem J* **436**:305-312.
- Meyer-Wentrup F, Karbach U, Gorboulev V, Arndt P, and Koepsell H (1998) Membrane localization of the electrogenic cation transporter rOCT1 in rat liver. *Biochem Biophys Res Commun* **248**:673-678.
- Micuda S, Fuksa L, Brackova E, Osterreicher J, Cermanova J, Cibicek N, Mokry J, Staud F, and Martinkova J (2008) Zonation of multidrug resistance-associated protein 2 in rat liver after induction with dexamethasone. *J Gastroenterol Hepatol* **23**:e225-230.

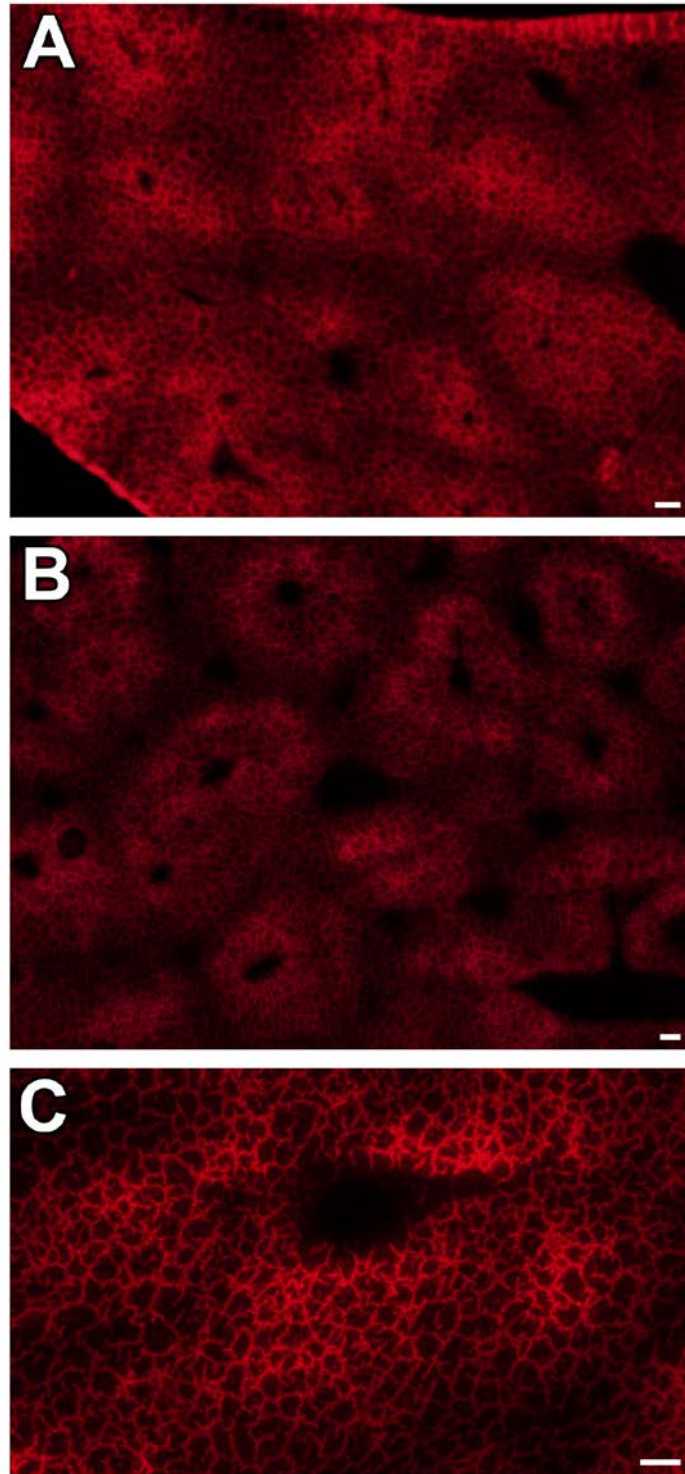

**Supplemental Figure S1** Uneven distribution of SR-101 in the liver acinus of mice at 30 min (A) or 90 min (B and C) after intravenous injection of SR-101. There are distinct regions strongly positive for SR-101 and either negative or weakly positive for SR-101, respectively. Scale bar: 50  $\mu$ m.

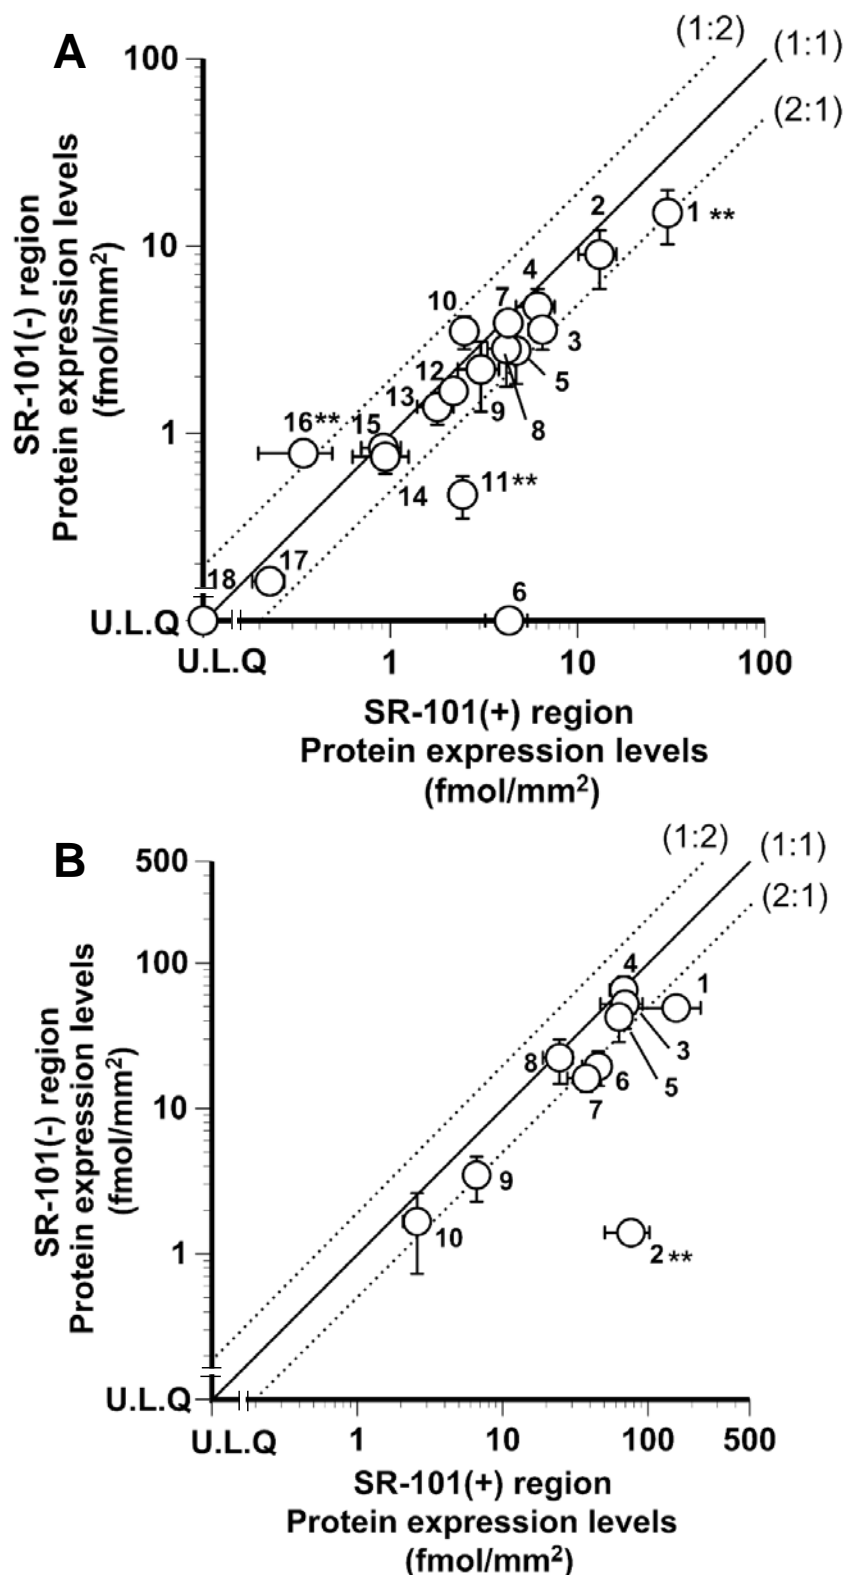

**Supplemental Figure S2** A comparison of protein expression levels of transporters/receptors (A) and metabolizing enzymes (B) in the SR-101(+) and SR-101(-) liver regions of mice intravenously injected with SR-101. The solid line passing through the origin represents the line of identity, and the broken lines represent 2-fold differences. A; 1. Oatp1a1, 2. Mct1, 3. Slc22a18, 4. Ntcp, 5. Ent1, 6. Oatp1b2, 7. FcRn, 8. Bcrp, 9. Mrp6, 10. Bsep, 11. Oct1, 12. Mrp2, 13. Abcb4, 14. Abcg5, 15. 4F2hc, 16. Oat2, 17. Mrp4, 18. Oatp1a4. B; 1. Cyp2c29, 2. Cyp2e1, 3. Ugt1a9, 4. Cyp3a11, 5. Ugt2b3, 6. Ugt1a1, 7. NADPH-CPR, 8. Cyp2d22, 9. Cyp51a1, 10. Cyp8b1. Each point represents the mean $\pm$ S.D. (n=3) in three independent analyses. U.L.Q; under the limit of quantification. \*\*p<0.01, significantly different between the SR-101(+) and SR-101(-) regions. The individual values are shown in Table 1.



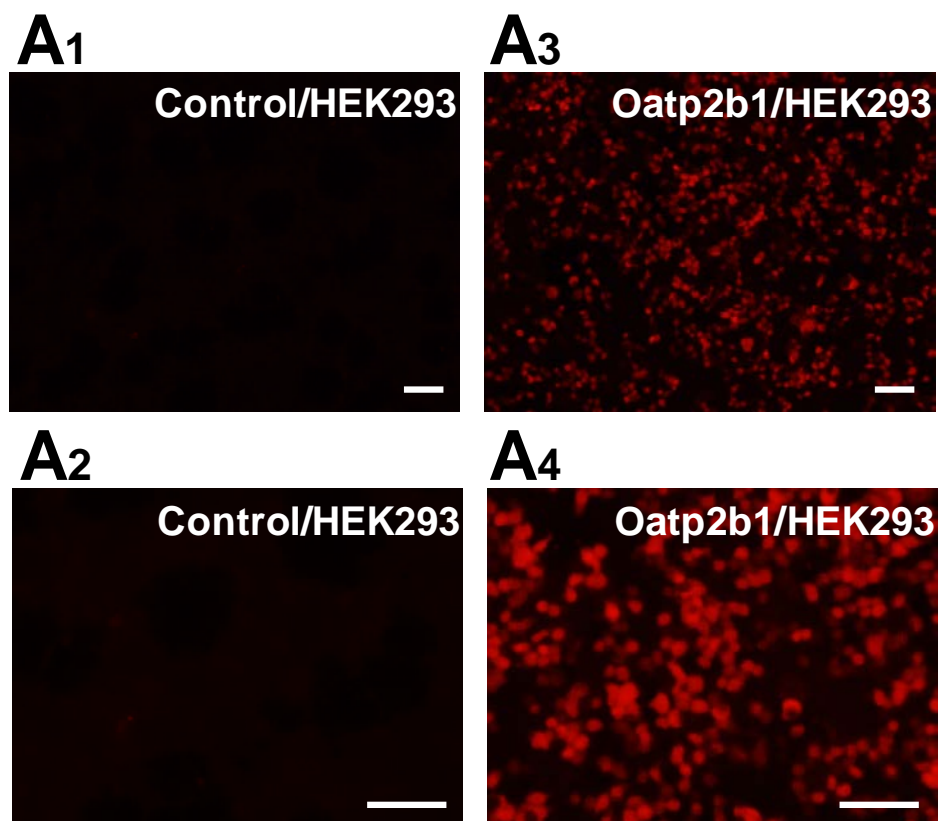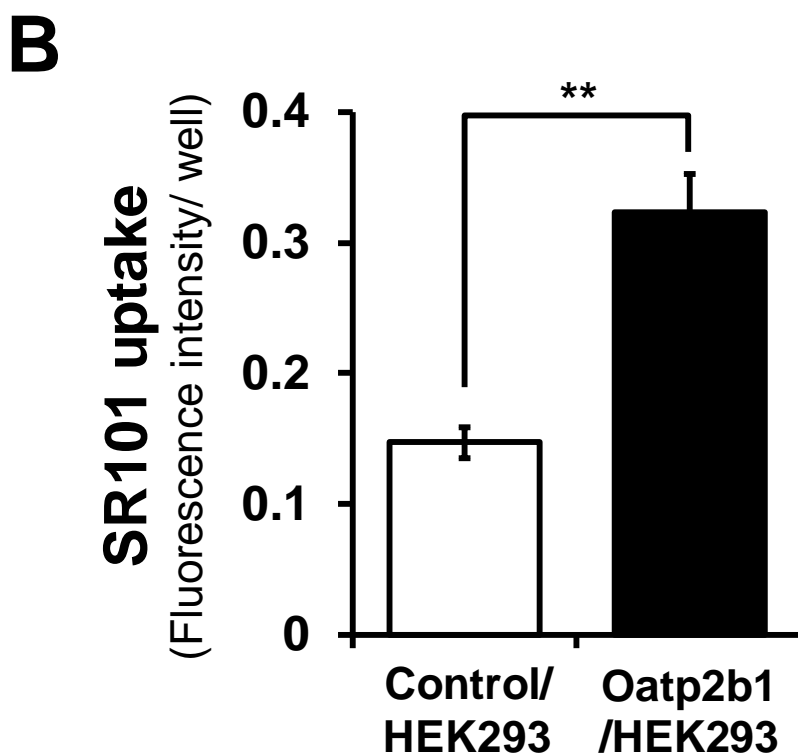

**Supplemental Figure S3** Mouse Oatp2b1 mediates SR-101 uptake. (A) Representative fluorescence images of SR-101 in control HEK293 cells (Control/HEK293; A1 and A2) and mouse Oatp2b1-overexpressing HEK293 cells (Oatp2b1/HEK293; A3 and A4). Scale bars: 100  $\mu$ m. (B) Comparison of the SR-101 uptake amounts in Control/HEK293 cells (open column) and Oatp2b1/HEK293 cells (closed column). Each column represents the mean  $\pm$  S.E.M (n=4). \*\*p<0.01, significantly different between Oatp2b1/HEK293 and Control/HEK293 cells.

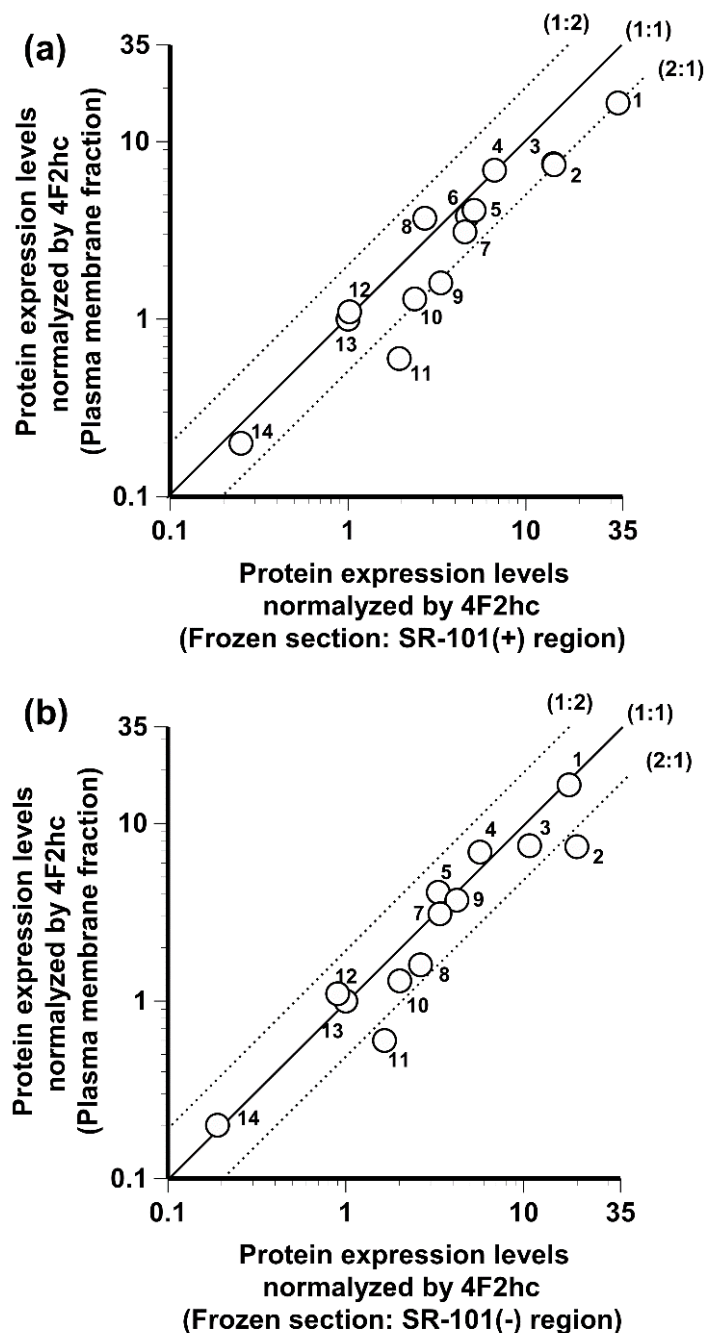

**Supplemental Figure S4** A comparison of protein expression levels of transporters, normalized by the level of 4F2hc, in the plasma membrane fractions of total mouse liver and laser-microdissected samples from frozen mouse liver sections. The data on plasma membranes are taken from the previous report (Miura et al., 2017). The data on the frozen liver sections are taken from Table 1. Each point represents the mean value of each transporter protein level divided by that of 4F2hc. The solid line passing through the origin represents the line of identity, and the broken lines represent 2-fold differences. The numbers near the circles identify the transporter: 1 Oatp1a1, 2 Na<sup>+</sup>, K<sup>+</sup>-ATPase, 3 Mct1, 4 Ntcp, 5 Ent1, 6 Oatp1b2, 7 Bcrp, 8 Mrp6, 9 Bsep, 10 Mrp2, 11 Abcb4, 12 Abcg5, 13 4F2hc, 14 Mrp4.

## Reference

Miura T, Tachikawa M, Ohtsuka H, Fukase K, Nakayama S, Sakata N, Motoi F, Naitoh T, Katayose Y, Uchida Y, Ohtsuki S, Terasaki T, Unno M (2017) Application of quantitative targeted absolute proteomics to profile protein expression changes of hepatic transporters and metabolizing enzymes during cholic acid-promoted liver regeneration. *J Pharm Sci* **106**:2499-2508.
